# Supplementary material
Source: ML conference proceedings conference paper supplement (https://openaccess.thecvf.com/content/cvpr_2015/html/Kuznetsova_Expanding_Object_Detectors_2015_CVPR_paper.html)
Supplement: Supplementary file 1 [file 1401-supp.pdf › 1401-supp/1401-supp.pdf]

# Expanding Object Detector’s HORIZON: Incremental Learning Framework for Object Detection in Videos (supplementary materials)

Alina Kuznetsova<sup>1,3</sup>, Sung Ju Hwang<sup>2</sup>, Bodo Rosenhahn<sup>1</sup>, and Leonid Sigal<sup>3</sup>

<sup>1</sup>Leibniz University Hannover, <sup>2</sup>UNIST, <sup>3</sup>Disney Research Pittsburgh

## 1. Probabilistic LME formulation

The probabilistic interpretation of the similarity  $d_{\mathbf{W}}(\mathbf{x}, \mathbf{u}_c)$  between a sample  $\mathbf{x}$  and a prototype  $\mathbf{u}_c$  in embedding space is given by the equation:

$$p(y = c | \mathbf{x}, d = 1) = \frac{e^{d_{\mathbf{W}}(\mathbf{x}, \mathbf{u}_c)/2\sigma^2}}{\sum_{i=1}^C e^{d_{\mathbf{W}}(\mathbf{x}, \mathbf{u}_i)/2\sigma^2}}. \quad (1)$$

and the large margin constraint is

$$\begin{aligned} d_{\mathbf{W}}(\mathbf{x}_i, \mathbf{u}_{y_i}) + \xi_{ic} &\geq d_{\mathbf{W}}(\mathbf{x}_i, \mathbf{u}_c) + 1, \\ i &= \{1 \dots N\}, c = \{1 \dots C\}, c \neq y_i, \end{aligned} \quad (2)$$

The ratio between  $p(y = y_i | \mathbf{x}_i, d = 1)$  and  $p(y = c | \mathbf{x}_i, d = 1), c \neq y_i$  can be then rewritten as:

$$\frac{p(y = y_i | \mathbf{x}_i, d = 1)}{p(y = c | \mathbf{x}_i, d = 1)} = \frac{e^{d_{\mathbf{W}}(\mathbf{x}, \mathbf{u}_{y_i})/2\sigma^2}}{e^{d_{\mathbf{W}}(\mathbf{x}, \mathbf{u}_c)/2\sigma^2}} = \quad (3)$$

$$= e^{d_{\mathbf{W}}(\mathbf{x}, \mathbf{u}_{y_i})/2\sigma^2 - d_{\mathbf{W}}(\mathbf{x}, \mathbf{u}_c)/2\sigma^2} \quad (4)$$

while the large margin constraint is equivalent to

$$d_{\mathbf{W}}(\mathbf{x}_i, \mathbf{u}_{y_i}) + \xi_{ic} \geq d_{\mathbf{W}}(\mathbf{x}_i, \mathbf{u}_c) + 1 \Leftrightarrow \quad (5)$$

$$d_{\mathbf{W}}(\mathbf{x}_i, \mathbf{u}_{y_i}) - d_{\mathbf{W}}(\mathbf{x}_i, \mathbf{u}_c) \geq 1 - \xi_{ic} \Leftrightarrow \quad (6)$$

$$e^{d_{\mathbf{W}}(\mathbf{x}_i, \mathbf{u}_{y_i}) - d_{\mathbf{W}}(\mathbf{x}_i, \mathbf{u}_c)} \geq e^{1 - \xi_{ic}} \approx e - \tilde{\xi}_{ic}, \quad (7)$$

in the neighbourhood of 0 for  $\xi_{ic}$

Therefore, large margin constraint for similarity measure is equivalent to the large margin constraint on the probabilistic measure, given in the following form:

$$\frac{p(y = y_i | \mathbf{x}_i, d = 1)}{p(y = c | \mathbf{x}_i, d = 1)} \geq e - \tilde{\xi}_{ic} \quad (8)$$

Equivalently, given the probabilistic interpretation

$$p(d = 1 | \mathbf{x}) = \frac{1}{1 + e^{ad_{\mathbf{W}}^m(\mathbf{x}) + b}} \quad (9)$$

$$d_{\mathbf{W}}^m(\mathbf{x}) = \max_c d_{\mathbf{W}}(\mathbf{x}, \mathbf{u}_c), \quad (10)$$

where  $a < 0, b$  parameters, that have the following interpretation:  $-\frac{1}{a}$  is the standard deviation and  $\frac{b}{a}$  is the mean of the logistic distribution.

Detection constraints

$$d_{\mathbf{W}}(\mathbf{x}_j^0, \mathbf{u}_c) \leq 1 + \xi_j^0, c = \{1, \dots, C\} \Leftrightarrow \quad (11)$$

$$d_{\mathbf{W}}^m(\mathbf{x}_j^0) \leq 1 + \xi_j^0, \quad (12)$$

can be reformulated as:

$$ad_{\mathbf{W}}^m(\mathbf{x}) + b \geq a + a\xi_j^0 + b \Leftrightarrow \quad (13)$$

$$e^{ad_{\mathbf{W}}^m(\mathbf{x}) + b} \geq e^{a + a\xi_j^0 + b} \Leftrightarrow \quad (14)$$

$$p(d = 1 | \mathbf{x}) = \frac{1}{1 + e^{ad_{\mathbf{W}}^m(\mathbf{x}) + b}} \leq \frac{1}{1 + e^{a + a\xi_j^0 + b}} \approx \quad (15)$$

$$\approx \frac{1}{1 + e^{a+b}} + \tilde{\xi}_j^0 \quad (16)$$

in the neighbourhood of 0 for  $\xi_j^0$

which states that for *non-object* samples its probability of being an object  $p(d = 1 | \mathbf{x}) \geq \frac{1}{1 + e^{a+b}}$  is pushed towards  $\frac{1}{1 + e^{a+b}}$  as  $\xi_j^0 \rightarrow 0$ . In practice, we set  $a = -8$  and  $b = 12$  in all experiments, so  $\frac{1}{1 + e^{a+b}} \ll \frac{1}{2}$ , which can be seen as a margin in *object - non-object* case.

The minimization functional is then formulated as following:

$$\sum_{i, c: c \neq y_i} \max(\tilde{\xi}_{ic}, 0) + \sum_j \max(\tilde{\xi}_j^0, 0) + \quad (17)$$

$$+ \frac{1}{2} \lambda \| \mathbf{W} \|_{FRO}^2 + \frac{1}{2} \gamma \| \mathbf{U} \|_{FRO}^2, \quad (18)$$

## 2. Full multi-prototype LME formulation

The optimization problem for learning multiple prototypes at once can be formulated as:

minimize:

$$\sum_{i,c:c \neq y_i} \max(\xi_{ic}, 0) + \sum_j \max(\xi_j^0, 0) + \quad (19)$$

$$+ \frac{1}{2} \lambda \|\mathbf{W}\|_{FRO}^2 + \frac{1}{2} \gamma \|\mathbf{U}\|_{FRO}^2$$

subject to:

$$S_{\mathbf{W}}^{\alpha}(\mathbf{x}_i, \mathbf{U}_{y_i}) + \xi_{ic} \geq S_{\mathbf{W}}^{\alpha}(\mathbf{x}_i, \mathbf{U}_c) + 1,$$

$$i = \{1, \dots, N\}, \quad c = \{1, \dots, C\}, \quad c \neq y_i,$$

$$S_{\mathbf{W}}^{\alpha}(\mathbf{x}_j^0, \mathbf{U}_c) \leq 1 + \xi_j^0,$$

$$c = \{1, \dots, C\}, \quad j = \{1, \dots, N_j\},$$

where the classification can be done for example:

$$y^* = \begin{cases} \operatorname{argmax}_c S_{\mathbf{W}}^{\alpha}(\mathbf{x}^*, \mathbf{U}_c), & S_{\mathbf{W}}^{\alpha}(\mathbf{x}^*, \mathbf{U}_c) \geq \tau, \\ c_0, & \forall c = 1, \dots, C : S_{\mathbf{W}}^{\alpha}(\mathbf{x}^*, \mathbf{U}_c) < \tau, \end{cases} \quad (20)$$
